# Supplementary material for: Association between severity of depressive symptoms and chronic knee pain in Korean adults aged over 50 years: a cross-sectional study using nationally representative data
Source: PubMed Central journal article supplement — BMJ Open. 2019 Dec 18;9(12):e032451. doi: 10.1136/bmjopen-2019-032451 (PMC6937089; doi:10.1136/bmjopen-2019-032451), 2019-12-18
Supplement: bmjopen-2019-032451supp001.pdf [file bmjopen-2019-032451supp001.pdf]

**Supplementary Table 1. Cochran-Armitage Trend Test**

| Cochran-Armitage Trend Test |           |
|-----------------------------|-----------|
| Statistics (Z)              | -903.3422 |
| Single sides Pr < Z         | <.0001    |
| Both sides Pr >  Z          | <.0001    |

Test results for linear relationship between pain and depressive symptoms can be found to be significant by the Cochran-Armitage Trend Test in Model 1. Pr, Probability.
