# Supplementary material for: Association between severity of depressive symptoms and chronic knee pain in Korean adults aged over 50 years: a cross-sectional study using nationally representative data
Source: PubMed Central journal article supplement — BMJ Open. 2019 Dec 18;9(12):e032451. doi: 10.1136/bmjopen-2019-032451 (PMC6937089; doi:10.1136/bmjopen-2019-032451), 2019-12-18
Supplement: bmjopen-2019-032451supp002.pdf [file bmjopen-2019-032451supp002.pdf]

**Supplementary Figure 1. Estimated probability graph of logistic regression according to levels of depressive symptom.**

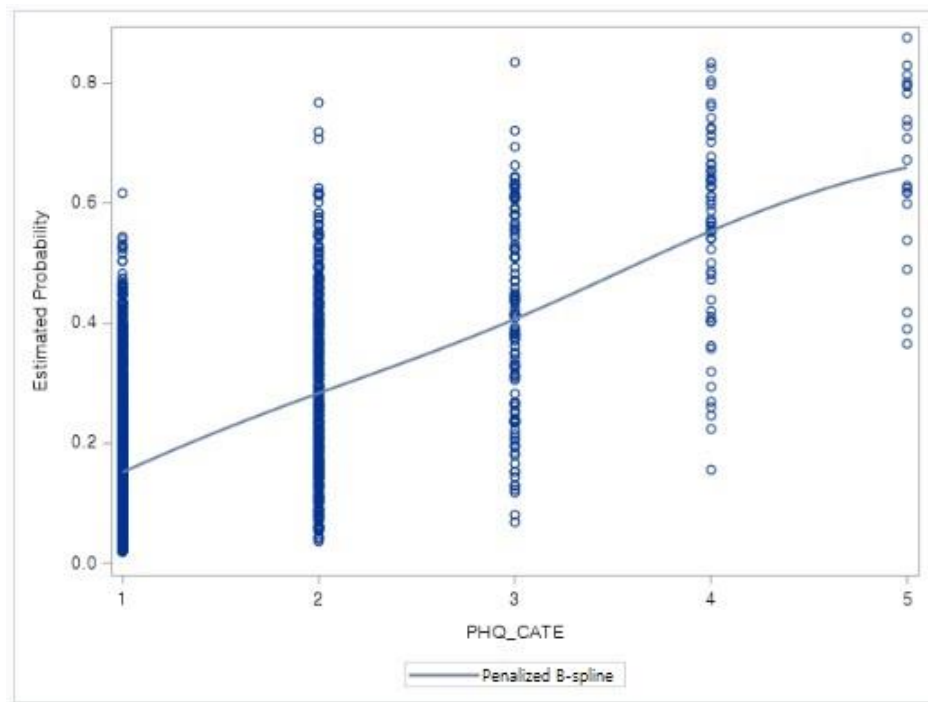

Estimated probability graph of logistic regression demonstrates a linear relationship in Model 3. PHQ-CATE, PHQ- categories 1 : None (0–4); 2 : Mild (5–9); 3 : Moderate (10–14); 4 : Moderately severe (15–19); 5 : Severe (20–27).
